# Supplementary material
Source: publisher site journal article supplement (https://www.spandidos-publications.com/2507/downloadSupplementary)
Supplement: Supplementary file 1 [file downloadSupplementary]

Figure S1. P4HA1 expression in P4HA1 knocked down cells with or without 5-FU treatment. P4HA1 expression was examined via western blotting in P4HA1 knocked down cells in the presence or absence of 5-FU treatment. P4HA1, prolyl 4-hydroxylase subunit  $\alpha$ 1; 5-FU, 5-fluorouracil.

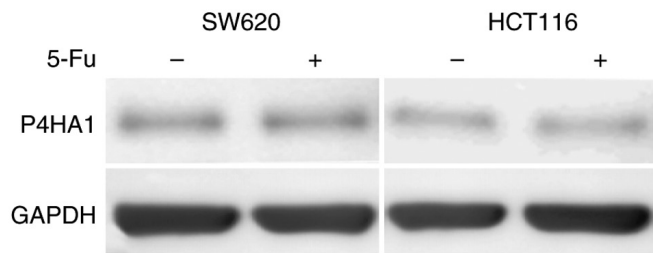

Table SI. Clinicopathological characteristics of patients with colorectal cancer.

| Clinical cases | Sex    | Age, years | Tumor differentiation | Lymph node metastasis | Distant metastasis |
|----------------|--------|------------|-----------------------|-----------------------|--------------------|
| 1              | Female | 69         | Moderate              | Absent                | Absent             |
| 2              | Male   | 71         | Poor                  | Present               | Present            |
| 3              | Male   | 59         | Moderate              | Absent                | Absent             |
| 4              | Male   | 67         | Moderate              | Absent                | Absent             |
| 5              | Female | 76         | Moderate              | Present               | Absent             |
| 6              | Female | 67         | Well                  | Absent                | Absent             |
| 7              | Male   | 72         | Well                  | Absent                | Absent             |
| 8              | Female | 81         | Well                  | Absent                | Absent             |
| 9              | Male   | 63         | Moderate              | Absent                | Absent             |
| 10             | Male   | 42         | Poor                  | Present               | Present            |
| 11             | Male   | 53         | Moderate              | Absent                | Absent             |
| 12             | Female | 77         | Moderate              | Absent                | Absent             |
| 13             | Female | 73         | Moderate              | Present               | Absent             |
| 14             | Male   | 57         | Well                  | Absent                | Absent             |
| 15             | Female | 66         | Poor                  | Present               | Present            |
| 16             | Male   | 60         | Moderate              | Absent                | Absent             |
| 17             | Male   | 75         | Moderate              | Absent                | Absent             |
| 18             | Male   | 50         | Poor                  | Present               | Absent             |
| 19             | Female | 58         | Well                  | Absent                | Absent             |
| 20             | Male   | 64         | Moderate              | Absent                | Absent             |
| 21             | Male   | 76         | Well                  | Absent                | Absent             |
| 22             | Male   | 52         | Moderate              | Present               | Present            |
| 23             | Female | 79         | Poor                  | Present               | Present            |
| 24             | Male   | 64         | Well                  | Absent                | Absent             |
| 25             | Male   | 57         | Poor                  | Absent                | Absent             |
| 26             | Female | 65         | Moderate              | Present               | Absent             |
| 27             | Female | 78         | Moderate              | Absent                | Absent             |
| 28             | Male   | 45         | Poor                  | Present               | Absent             |
| 29             | Male   | 60         | Well                  | Absent                | Absent             |
| 30             | Female | 70         | Moderate              | Present               | Absent             |
